# Supplementary material for: Lipoprotein Particle Profiles Associated with Telomere Length and Telomerase Complex Components
Source: MDPI journal article supplement (doi:10.3390/nu15112624), 2023-06-03
Supplement: s1 [file s1]

## Supplementary information for

# Lipoprotein particle profiles associated with telomere length and telomerase complex components.

Nil Novau-Ferré <sup>1,2,3</sup>, Melina Rojas <sup>1,2,3</sup>, Laia Gutierrez-Tordera <sup>1,2,3</sup>, Pierre Arcelin <sup>2,4</sup>, Jaume Folch <sup>1,2,3,5</sup>, Christopher Papandreou <sup>1,2,3,6,\*,†</sup>, and Mònica Bulló <sup>1,2,3,4,7,\*,†</sup>

- <sup>1</sup> Nutrition and Metabolic Health Research Group, Department of Biochemistry and Biotechnology, Rovira i Virgili University (URV), 43201 Reus, Spain; [nil.novau@urv.cat](mailto:nil.novau@urv.cat) (N.N.-F.); [melinaisabella.rojas@urv.cat](mailto:melinaisabella.rojas@urv.cat) (M.R.); [laia.gutierrez@iispv.cat](mailto:laia.gutierrez@iispv.cat) (L.G.-T.); [jaume.folch@urv.cat](mailto:jaume.folch@urv.cat) (J.F.); [monica.bullo@urv.cat](mailto:monica.bullo@urv.cat) (M.B.)
- <sup>2</sup> Institute of Health Pere Virgili (IISPV), Reus, Spain. Institute of Health Pere Virgili (IISPV), 43204 Reus, Spain; [pierrealphonse.arcelin@salutsantjoan.cat](mailto:pierrealphonse.arcelin@salutsantjoan.cat) (P.A.); [christoforos.papandreou@iispv.cat](mailto:christoforos.papandreou@iispv.cat) (C.P.)
- <sup>3</sup> Center of Environmental, Food and Toxicological Technology (TecnATox), Rovira i Virgili University, 43201 Reus, Spain.
- <sup>4</sup> Atención Basica de Salud (ABS) Reus V. Centro de Atención Primaria Marià Fortuny, SAGESSA, 43204 Reus, Spain.
- <sup>5</sup> Biomedical Research Networking Centre in Neurodegenerative Diseases (CIBERNED), Carlos III Health Institute, 28031 Madrid, Spain.
- <sup>6</sup> Department of Nutrition and Dietetics Sciences, School of Health Sciences, Hellenic Mediterranean University (HMU), 72300 Siteia, Greece
- <sup>7</sup> CIBER Physiology of Obesity and Nutrition (CIBEROBN), Carlos III Health Institute, 28029 Madrid, Spain.
- \* Correspondence: [christoforos.papandreou@iispv.cat](mailto:christoforos.papandreou@iispv.cat) (C.P.); [monica.bullo@urv.cat](mailto:monica.bullo@urv.cat) (M.B.)
- † Senior authors.

## This PDF file includes:

Figures S1 to S2

Tables S1 to S3

**Table S1.** Median and interquartile range of concentrations for the 12 lipoproteins subclasses quantified by nuclear magnetic resonance.

| Metabolites       | Median [interquartile range] |
|-------------------|------------------------------|
| Total VLDL-P (nM) | 36.06 [25.46, 53.06]         |
| L-VLDL-P (nM)     | 0.80 [0.48, 1.46]            |
| M-VLDL-P (nM)     | 4.62 [2.62, 7.86]            |
| S-VLDL-P (nM)     | 31.29 [22.79, 46.22]         |
| Total LDL-P (nM)  | 1230.05 [1052.30, 1356.00]   |
| L-LDL-P (nM)      | 133.03 [105.87, 164.97]      |
| M-LDL-P (nM)      | 455.33 [374.00, 526.50]      |
| S-LDL-P (nM)      | 609.77 [519.80, 695.60]      |
| Total HDL-P (μM)  | 30.65 [27.92, 33.11]         |
| L-HDL-P (μM)      | 0.81 [0.43, 1.41]            |
| M-HDL-P (μM)      | 6.44 [4.52, 7.84]            |
| S-HDL-P (μM)      | 22.85 [20.58, 24.85]         |

Abbreviations: -P, particle; L-, Large; M-, Medium; S-, Small; HDL, high-density lipoprotein; LDL, low-density lipoprotein; VLDL, very low-density lipoprotein.

**Table S2.** List of lipoproteins subclasses selected at least 90% times in the leave-one-out cross-validation.

| Telomere length         |                              |                         |                              |
|-------------------------|------------------------------|-------------------------|------------------------------|
| Lipoproteins subclasses | $\beta$ coefficient (95% CI) | Lipoproteins subclasses | $\beta$ coefficient (95% CI) |
| L-HDL-P                 | 0.014 (0.012, 0.016)         | M-HDL-P                 | -0.049 (-0.050, -0.047)      |
| L-LDL-P                 | 0.008 (0.007, 0.010)         | HDL-P                   | -0.017 (-0.019, -0.015)      |
| TERT                    |                              |                         |                              |
| Lipoproteins subclasses | $\beta$ coefficient (95% CI) | Lipoproteins subclasses | $\beta$ coefficient (95% CI) |
| L-HDL-P                 | 0.019 (0.019, 0.020)         | S-HDL-P                 | -0.024 (-0.025, -0.023)      |
| WRAP53                  |                              |                         |                              |
| Lipoproteins subclasses | $\beta$ coefficient (95% CI) | Lipoproteins subclasses | $\beta$ coefficient (95% CI) |
| S-LDL-P                 | 0.025 (0.024, 0.026)         | S-VLDL-P                | -0.035 (-0.036, -0.034)      |
|                         |                              | S-HDL-P                 | -0.029 (-0.030, -0.028)      |
|                         |                              | L-LDL-P                 | -0.020 (-0.020, -0.019)      |
|                         |                              | L-HDL-P                 | -0.008 (-0.009, -0.007)      |

Abbreviations: -C, cholesterol; -P, particle; L-, Large; M-, Medium; S-, Small; HDL, high-density lipoprotein; LDL, low-density lipoprotein; VLDL, very low-density lipoprotein; %, Percentage; CI, confidence interval.

**Figure S1.** Plot of the 12 lipoproteins subclasses according to the percentage of missingness in 54 participants.

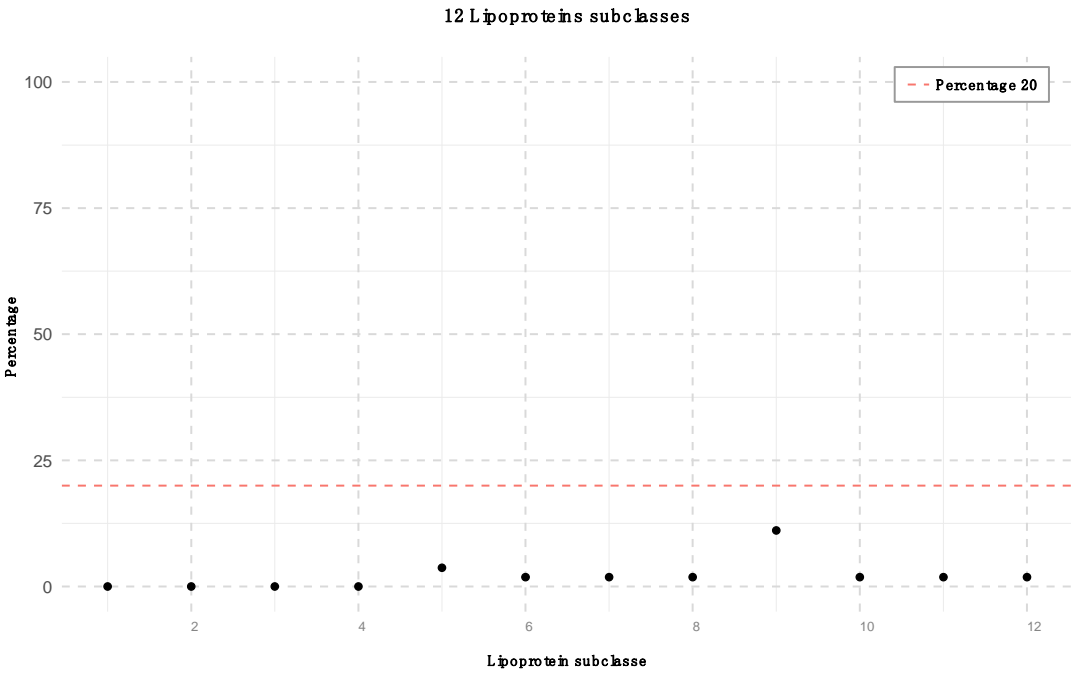

**Figure S2. Spearman correlation matrix for all the 12 lipoproteins and lipoprotein subclasses considered in the analysis.** Spearman correlation matrix for all the 12 lipoproteins and lipoprotein subclasses considered in the analysis. The colors in the matrix represent the direction of the correlation, with blue indicating a positive correlation and red indicating an inverse correlation. The color depth corresponds to the magnitude of the correlation, with darker shades indicating stronger correlations. Significant correlations are indicated by dots.

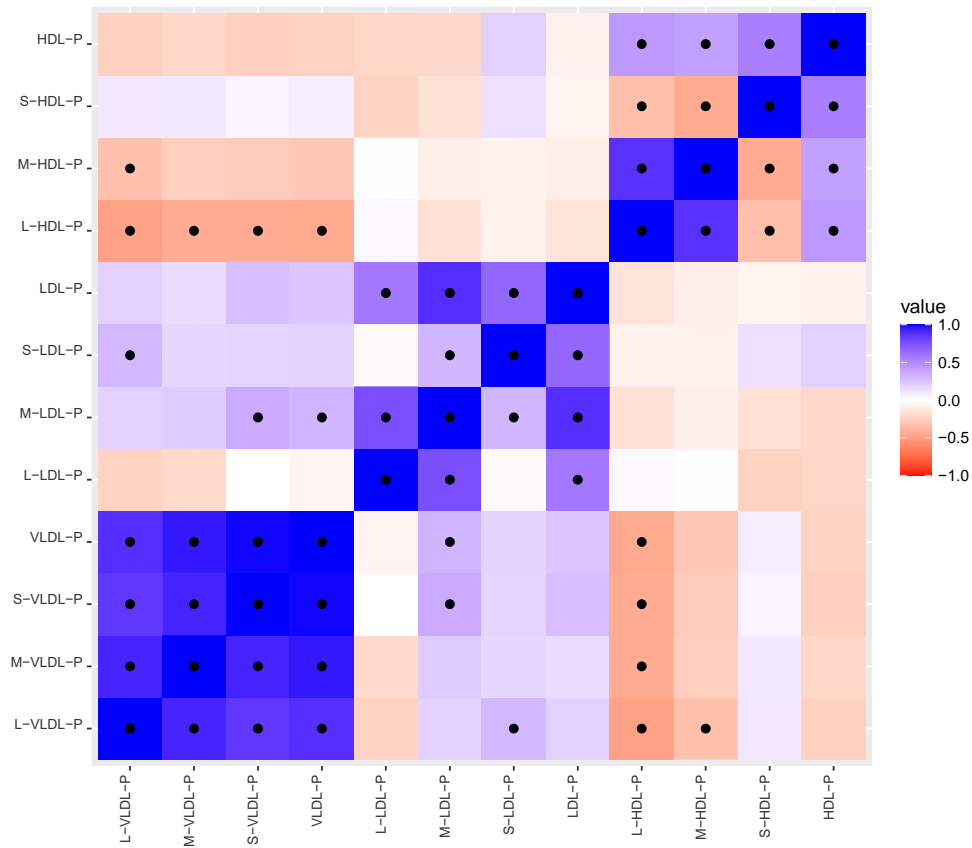

**Table S3.** Lipoprotein subclasses ranked from highest to lowest LASSO positive and negative regression coefficients for telomere length, *TERT* (Telomerase Reverse Transcriptase), and *WRAP53* (WD Repeat Containing Antisense To TP53) in a sensitivity analysis with adjustments.

| Telomere length         |                              |                         |                              |
|-------------------------|------------------------------|-------------------------|------------------------------|
| Lipoproteins subclasses | $\beta$ coefficient (95% CI) | Lipoproteins subclasses | $\beta$ coefficient (95% CI) |
|                         |                              | M-HDL-P                 | -0.020                       |
| <i>TERT</i>             |                              |                         |                              |
| Lipoproteins subclasses | $\beta$ coefficient (95% CI) | Lipoproteins subclasses | $\beta$ coefficient (95% CI) |
| L-HDL-P                 | 0.011                        | S-HDL-P                 | -0.014                       |
|                         |                              | M-VLDL-P                | -0.002                       |
| <i>WRAP53</i>           |                              |                         |                              |
| Lipoproteins subclasses | $\beta$ coefficient (95% CI) | Lipoproteins subclasses | $\beta$ coefficient (95% CI) |
| S-LDL-P                 | 0.019                        | S-VLDL-P                | -0.038                       |
|                         |                              | S-HDL-P                 | -0.023                       |
|                         |                              | L-LDL-P                 | -0.016                       |

Abbreviations: -P, particle; L-, Large; M-, Medium; S-, Small; HDL, high-density lipoprotein; LDL, low-density lipoprotein; VLDL, very low-density lipoprotein.  
 Regression was adjusted for age (continuous), sex, BMI (continuous), dyslipidemia, acetylsalicylic acid consumption, statin use, and leisure-time physical activity (measured in Kcal/day) (continuous).
